# Supplementary material
Source: PubMed Central journal article supplement (PMC5237379)
Supplement: NIHMS841039-supplement-Supplemental_Figures.pdf [file NIHMS841039-supplement-Supplemental_Figures.pdf]

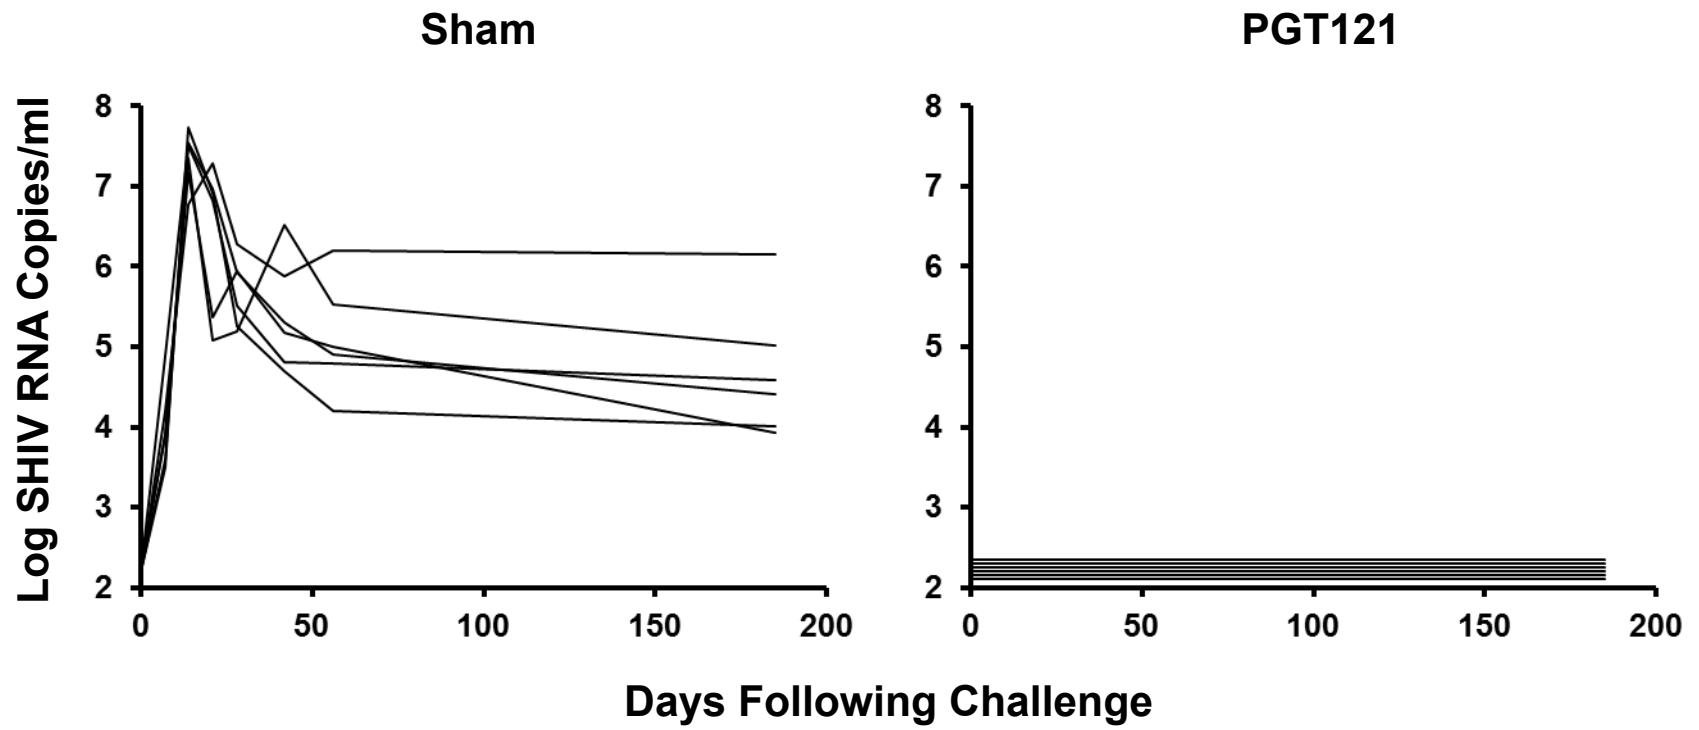

Figure S1

Median Number of Viral RNA Positive Tissues/Monkey  
Distal to the Female Reproductive Tract

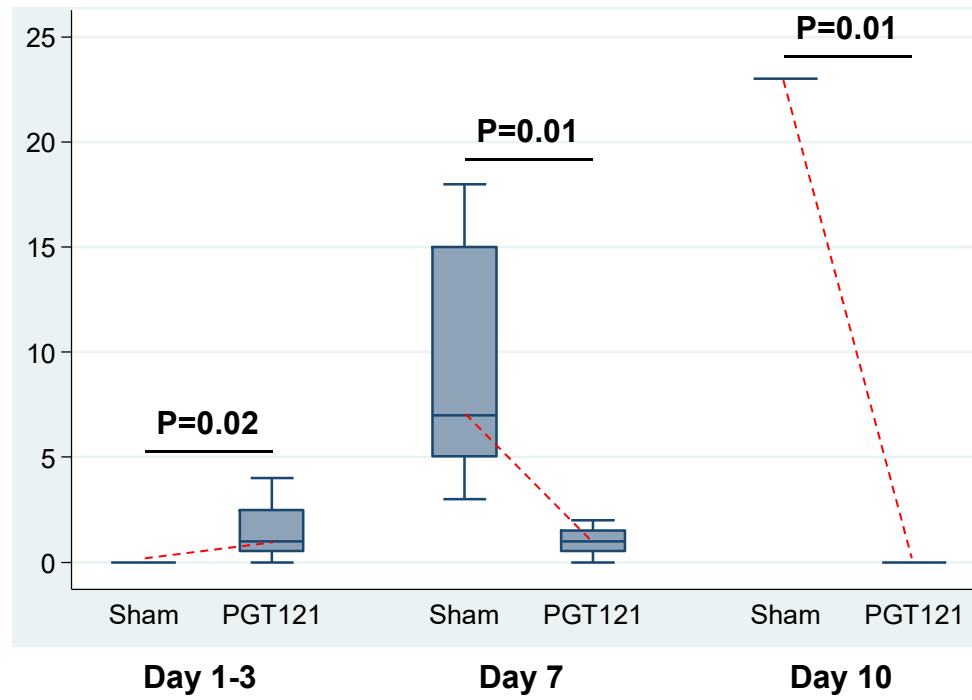

Figure S2

# Day 1-3

## Sham

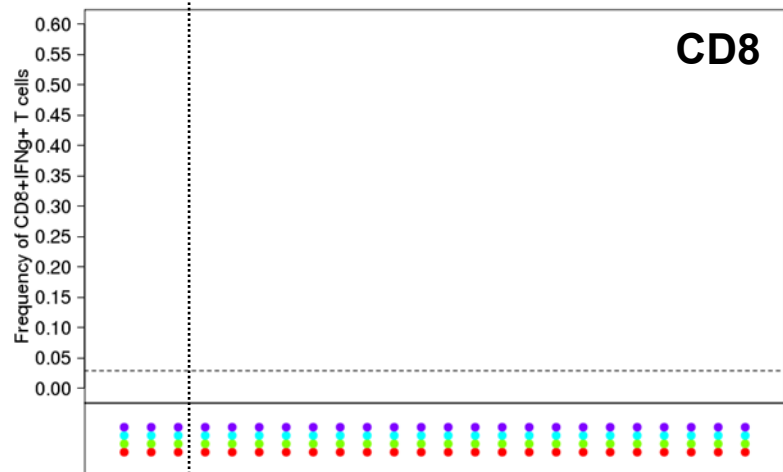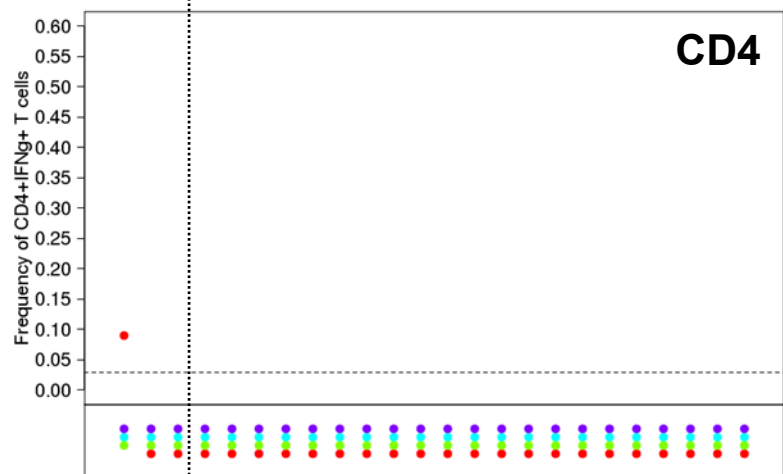

Mid-Vagina 1  
Cervix  
Uterus  
Genital/Pelvic Lymph Node  
Sacral Lymph Node  
Duodenum  
Jejunum  
Ileum  
Cecum  
Colon  
Rectum  
Mesenteric Lymph Node  
Ileocecal Lymph Node  
Inguinal Lymph Node  
Paracolic Lymph Node  
Axillary Lymph Node  
Tonsil  
Spleen  
Bone Marrow  
Thymus  
Lungs  
Liver  
Brain  
PBMC

## PGT121

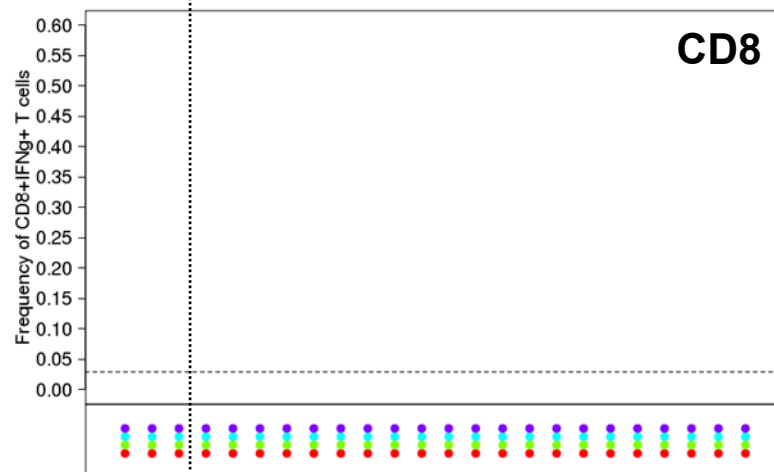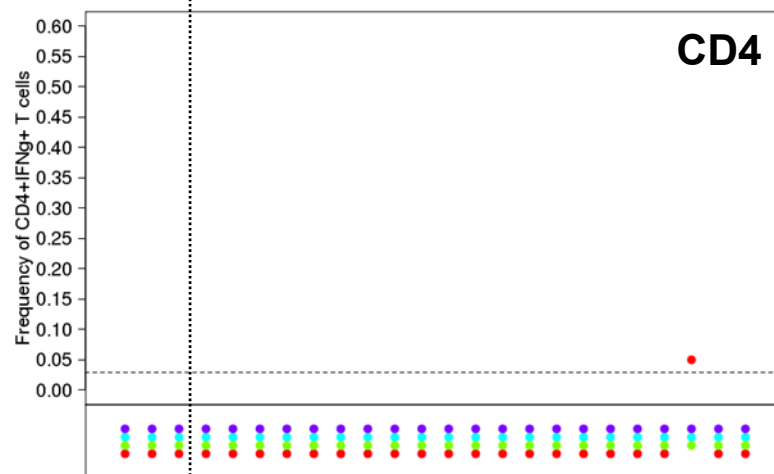

Mid-Vagina 1  
Cervix  
Uterus  
Genital/Pelvic Lymph Node  
Sacral Lymph Node  
Duodenum  
Jejunum  
Ileum  
Cecum  
Colon  
Rectum  
Mesenteric Lymph Node  
Ileocecal Lymph Node  
Inguinal Lymph Node  
Paracolic Lymph Node  
Axillary Lymph Node  
Tonsil  
Spleen  
Bone Marrow  
Thymus  
Lungs  
Liver  
Brain  
PBMC

Figure S3

**A****Day 7**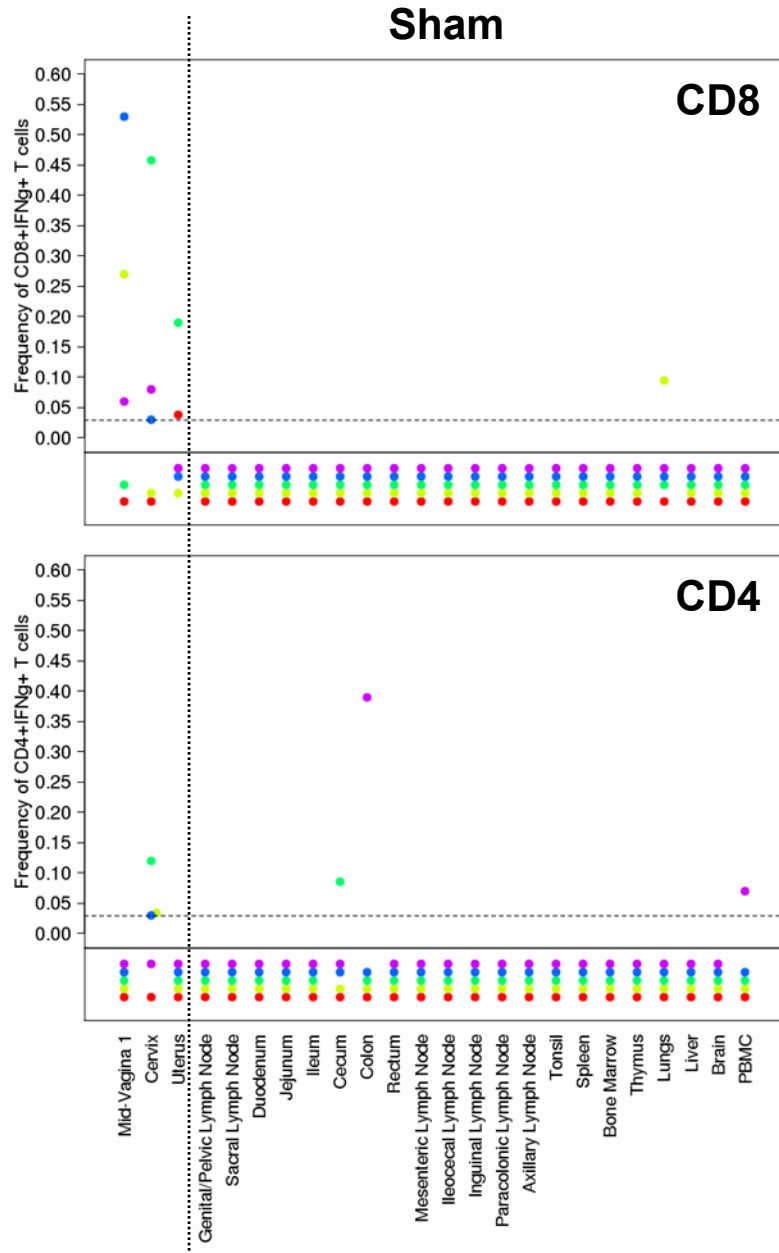

6339  
6340  
6341  
BC64  
BD04

**PGT121**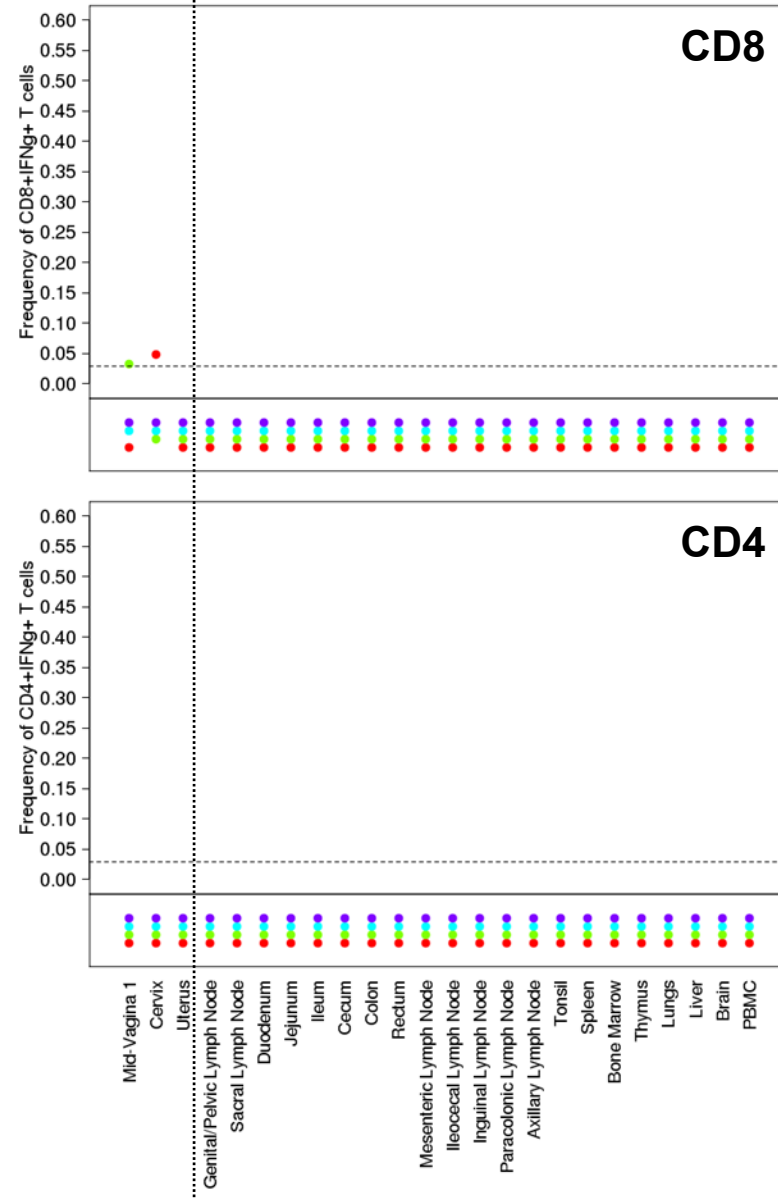

6345  
6346  
6347  
MK0

**Figure S4**

**B****Day 10**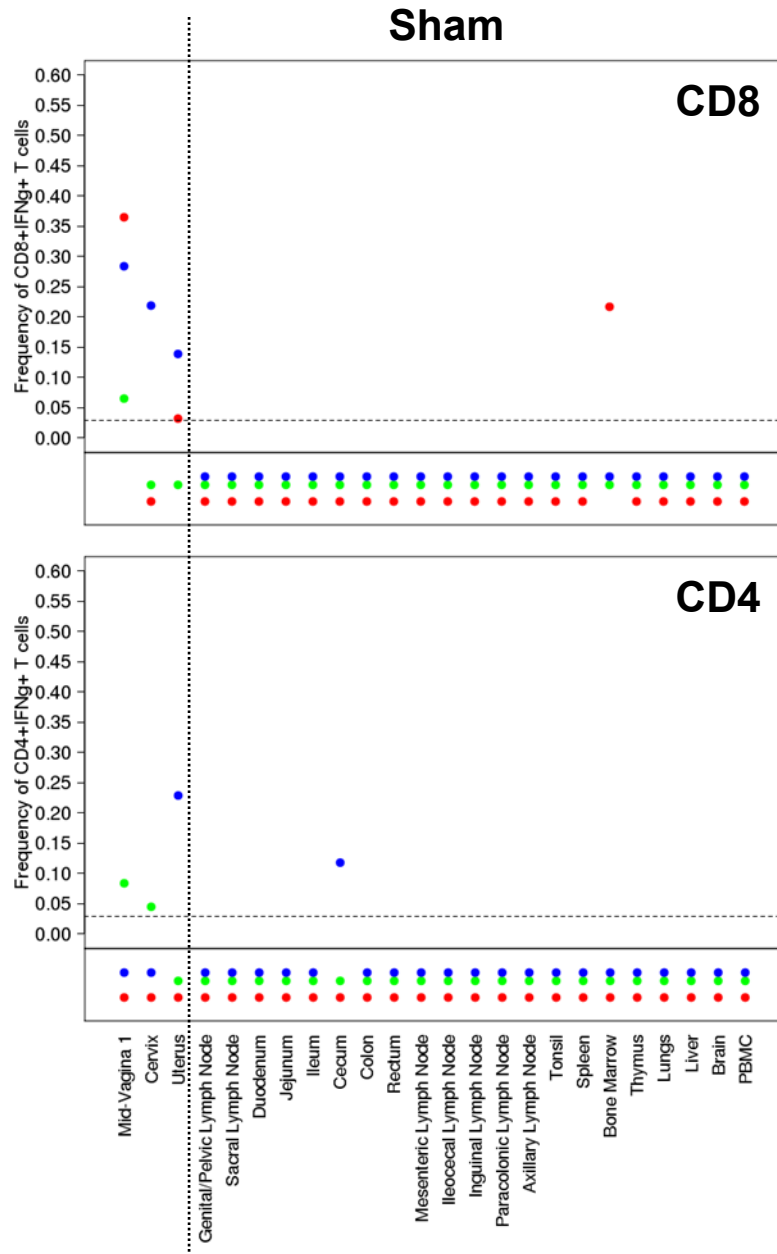

Legend: 6342 (red), 6343 (green), 6344 (blue)

Legend: 6342 (red), 6343 (green), 6344 (blue)

**PGT121**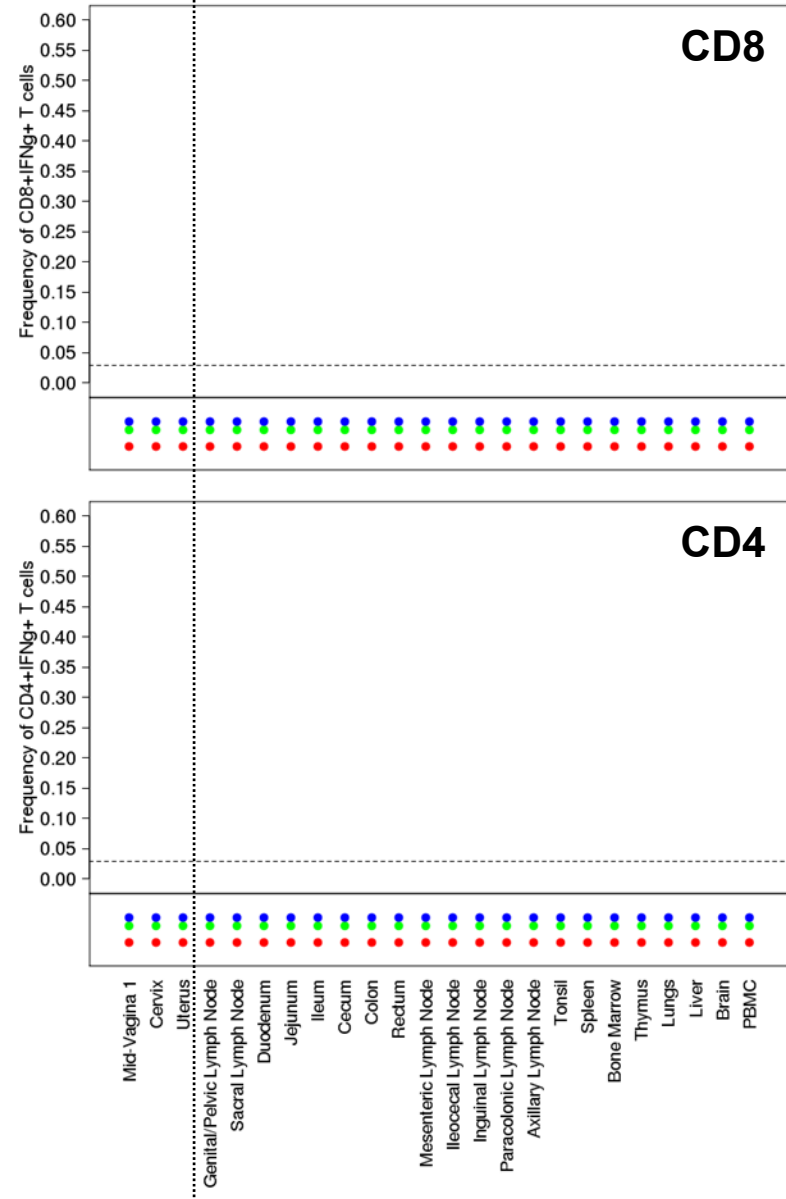

Legend: 6348 (red), 6349 (green), 6350 (blue)

Legend: 6348 (red), 6349 (green), 6350 (blue)

**Figure S5**

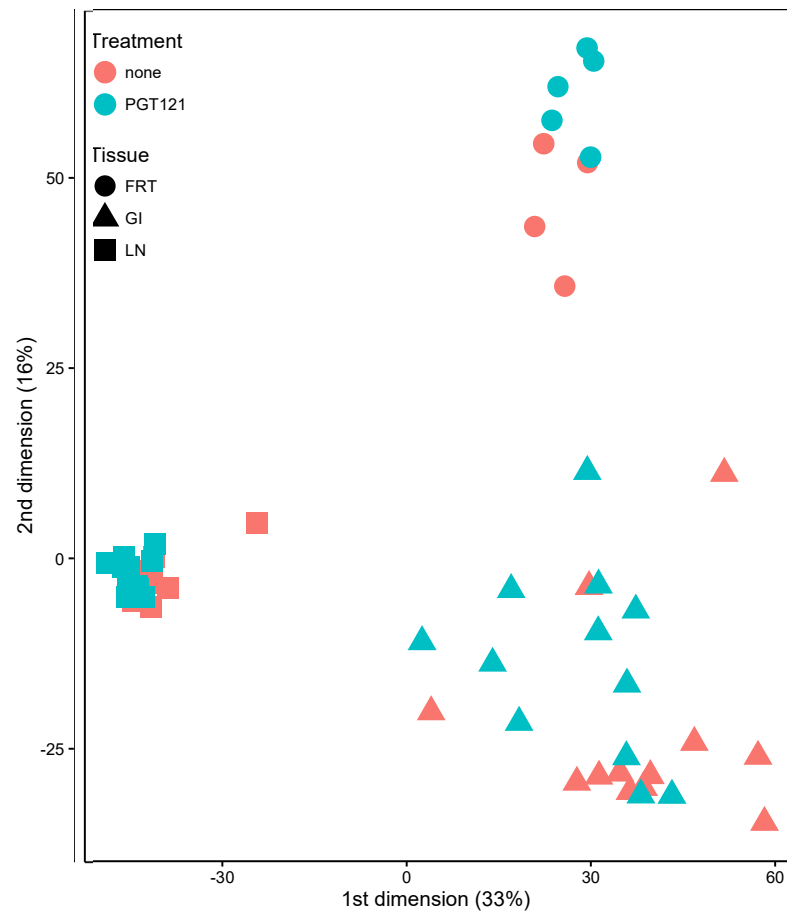

Figure S6

| SampleID  | DonorID | SampleType        | Tissue | Detection | Treatment | TimePoint |
|-----------|---------|-------------------|--------|-----------|-----------|-----------|
| Set44_E13 | BD66    | Mid_Vagina        | FRT    | Positive  | PGT121    | D1        |
| Set44_E14 | BD66    | Cervix            | FRT    | Positive  | PGT121    | D1        |
| Set44_E15 | BD66    | Uterus            | FRT    | Positive  | PGT121    | D1        |
| Set44_E17 | BD66    | Duodenum          | GI     | Positive  | PGT121    | D1        |
| Set44_E22 | BD66    | Rectum            | GI     | Positive  | PGT121    | D1        |
| Set44_E8  | BD66    | genital_pelvic_LN | LN     | Positive  | PGT121    | D1        |
| Set44_E26 | BD66    | Sacral_LN         | LN     | Positive  | PGT121    | D1        |
| Set44_E18 | BD66    | Jejunum           | GI     | Negative  | PGT121    | D1        |
| Set44_E19 | BD66    | Ileum             | GI     | Negative  | PGT121    | D1        |
| Set44_E20 | BD66    | Cecum             | GI     | Negative  | PGT121    | D1        |
| Set44_E21 | BD66    | Colon             | GI     | Negative  | PGT121    | D1        |
| Set44_E3  | BD66    | axillary_LN       | LN     | Negative  | PGT121    | D1        |
| Set44_E4  | BD66    | Inguinal_LN       | LN     | Negative  | PGT121    | D1        |
| Set44_E5  | BD66    | mesenteric_LN     | LN     | Negative  | PGT121    | D1        |
| Set44_E6  | BD66    | ileocecal_LN      | LN     | Negative  | PGT121    | D1        |
| Set45_E14 | BE34    | Cervix            | FRT    | Positive  | PGT121    | D1        |
| Set45_E15 | BE34    | Uterus            | FRT    | Positive  | PGT121    | D1        |
| Set45_E22 | BE34    | Rectum            | GI     | Positive  | PGT121    | D1        |
| Set45_E17 | BE34    | Duodenum          | GI     | Negative  | PGT121    | D1        |
| Set45_E18 | BE34    | Jejunum           | GI     | Negative  | PGT121    | D1        |
| Set45_E19 | BE34    | Ileum             | GI     | Negative  | PGT121    | D1        |
| Set45_E20 | BE34    | Cecum             | GI     | Negative  | PGT121    | D1        |
| Set45_E21 | BE34    | Colon             | GI     | Negative  | PGT121    | D1        |
| Set45_E3  | BE34    | axillary_LN       | LN     | Negative  | PGT121    | D1        |
| Set45_E4  | BE34    | Inguinal_LN       | LN     | Negative  | PGT121    | D1        |
| Set45_E5  | BE34    | mesenteric_LN     | LN     | Negative  | PGT121    | D1        |
| Set45_E6  | BE34    | ileocecal_LN      | LN     | Negative  | PGT121    | D1        |
| Set45_E8  | BE34    | genital_pelvic_LN | LN     | Negative  | PGT121    | D1        |
| Set45_E26 | BE34    | Sacral_LN         | LN     | Negative  | PGT121    | D1        |

**Figure S7**

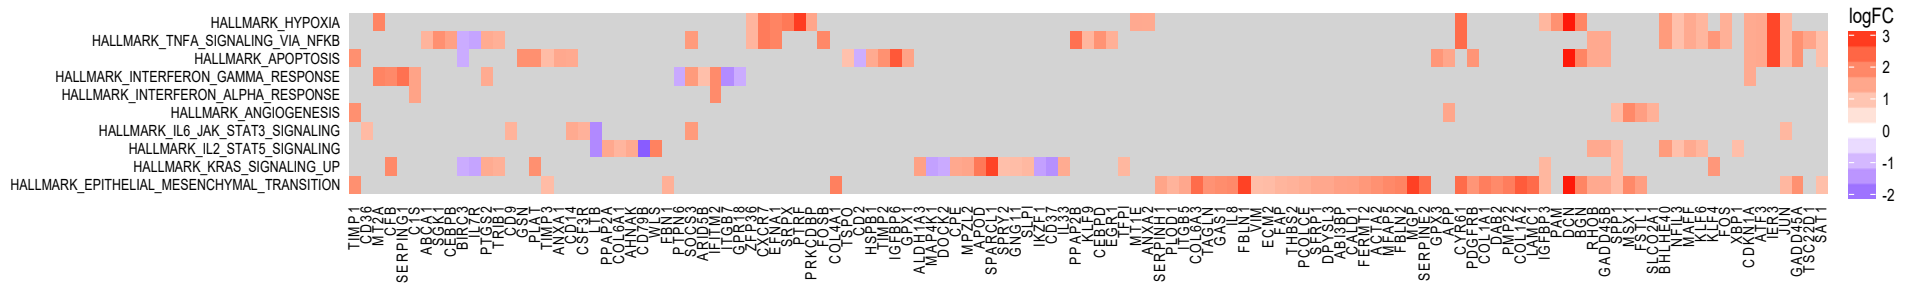

**RED = upregulated in viral RNA-positive tissues in PGT121 treated animals**

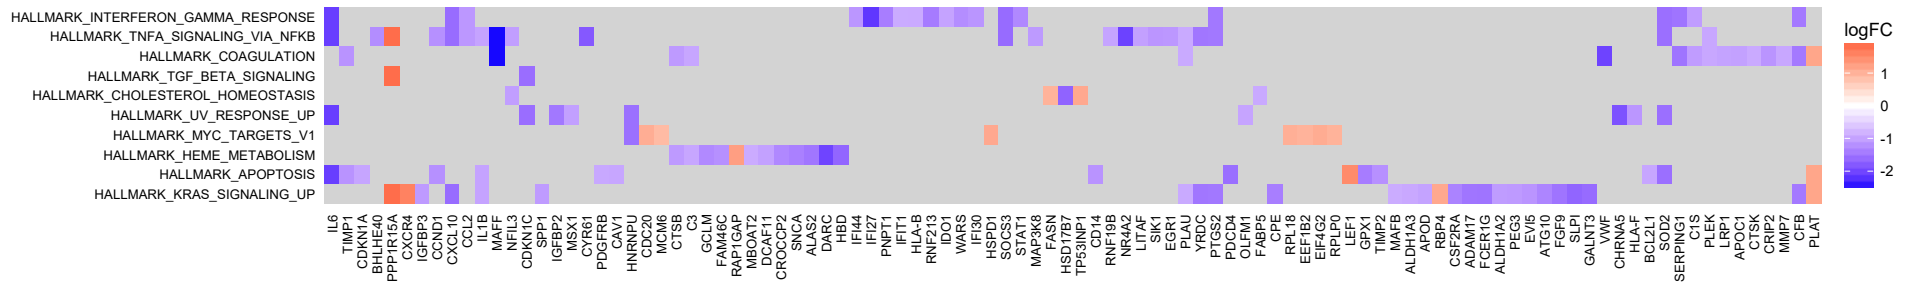

**BLUE = downregulated in viral RNA-positive tissues in PGT121 treated animals**

**Figure S8**



| <b>PATHWAY</b>                         | <b>FDR</b> |
|----------------------------------------|------------|
| cellular response to type I interferon | 1.64E-46   |
| type I interferon signaling pathway    | 1.64E-46   |
| response to type I interferon          | 1.74E-46   |
| response to virus                      | 2.85E-29   |
| regulation of viral genome replication | 2.49E-17   |
| regulation of viral process            | 1.91E-16   |
| response to interferon-gamma           | 1.91E-16   |
| viral genome replication               | 3.52E-16   |
| negative regulation of viral process   | 3.74E-16   |
| defense response to virus              | 5.07E-16   |

**Figure S9**

**A**

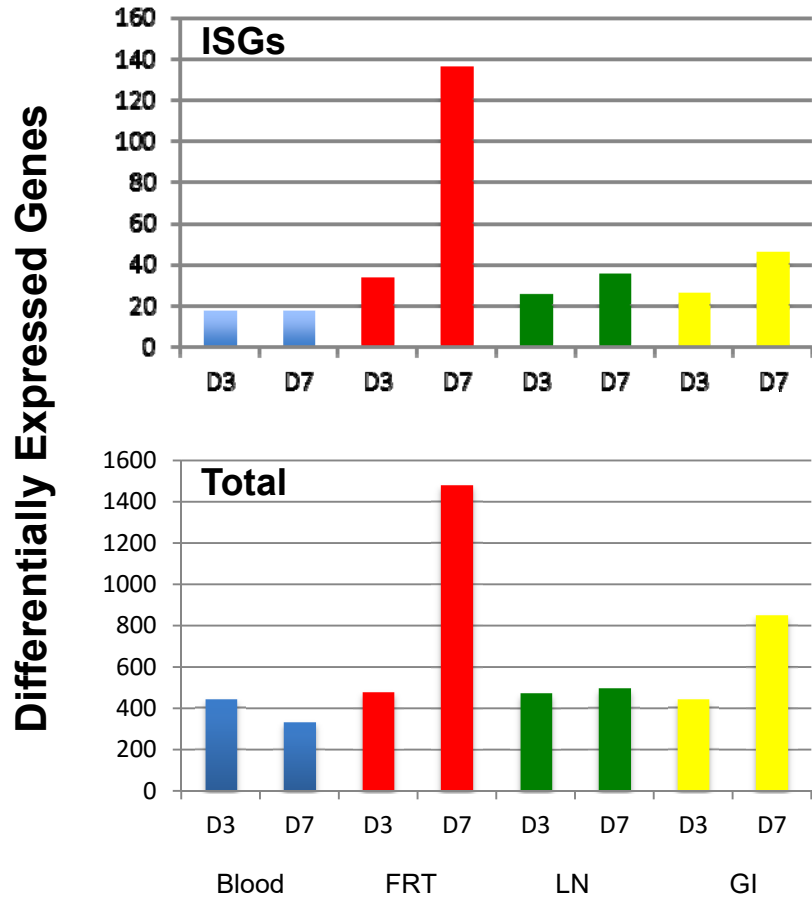

**B**

**Antiviral Restriction Factors**

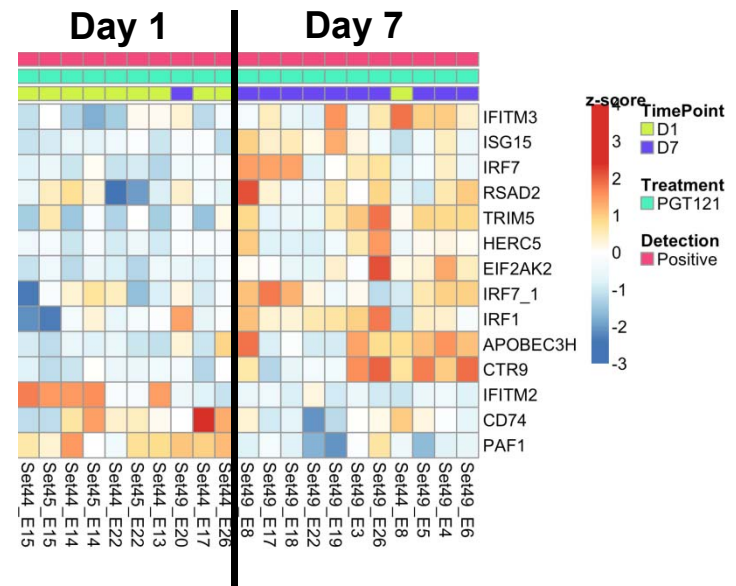

**Figure S10**

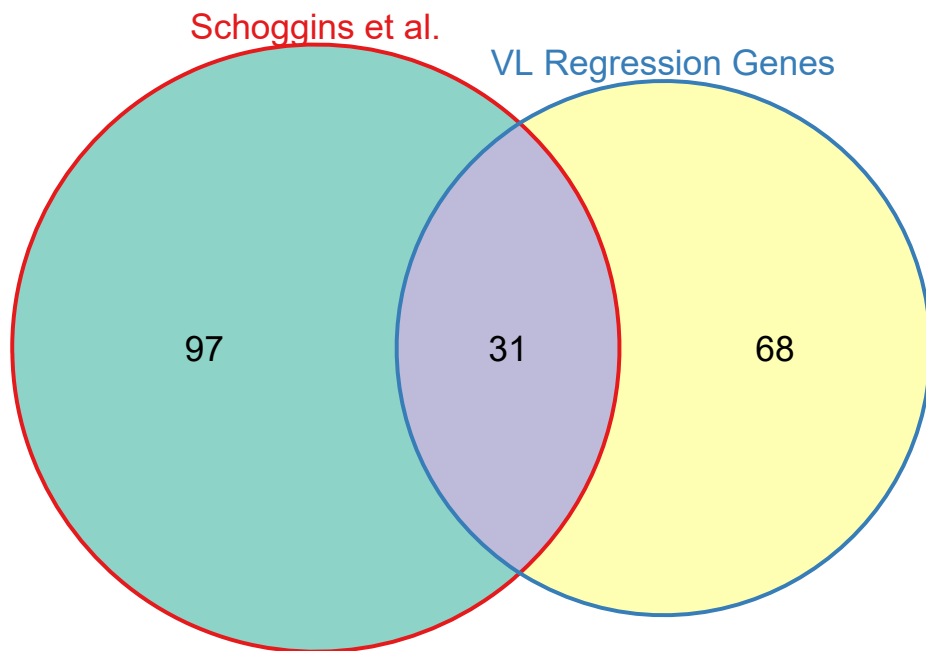

| <i>n</i> | <i>Gene</i> |
|----------|-------------|
| 1        | CASP1       |
| 2        | CXCL10      |
| 3        | EIF2AK2     |
| 4        | GBP1        |
| 5        | IFI27       |
| 6        | IFI30       |
| 7        | IFI44       |
| 8        | IFI6        |
| 9        | IFIH1       |
| 10       | IFIT1       |
| 11       | IFIT3       |
| 12       | IL15        |
| 13       | ISG15       |
| 14       | MX1         |
| 15       | OAS1        |
| 16       | OAS2        |
| 17       | OAS3        |
| 18       | PSMB8       |
| 19       | PSMB9       |
| 20       | PSME1       |
| 21       | SP110       |
| 22       | STAT1       |
| 23       | TAP1        |
| 24       | TAP2        |
| 25       | TAPBP       |
| 26       | UBE2L6      |
| 27       | IRF7        |
| 28       | MX2         |
| 29       | RSAD2       |
| 30       | TRIM22      |
| 31       | STAT2       |

**Figure S11**

| <u>Day</u> | <u>Monkey</u> | <u>RNA Positive</u>                                  | <u>DNA Positive</u> | <u>Adoptive Transfer</u> |
|------------|---------------|------------------------------------------------------|---------------------|--------------------------|
| 1          | <b>BD66</b>   | genital/pelvic LN<br>sacral LN<br>duodenum<br>rectum | genital/pelvic LN   | positive                 |
| 1          | <b>BE34</b>   | rectum                                               | (-)                 |                          |
| 3          | <b>CP20</b>   | (-)                                                  | ileocecal LN        | negative                 |
| 3          | <b>E41</b>    | basal ganglia                                        | cecum               |                          |
| 7          | <b>6345</b>   | bone marrow<br>spleen                                | bone marrow         | positive                 |
| 7          | <b>6346</b>   | colon                                                | (-)                 |                          |
| 7          | <b>6347</b>   | genital/pelvic LN                                    | (-)                 |                          |
| 7          | <b>MK0</b>    | (-)                                                  | (-)                 |                          |
| 10         | <b>6348</b>   | (-)                                                  | (-)                 |                          |
| 10         | <b>6349</b>   | (-)                                                  | (-)                 |                          |
| 10         | <b>6350</b>   | (-)                                                  | (-)                 |                          |

**Figure S12**
